# Supplementary material for: The Influence of Cadmium Stress on the Content of Mineral Nutrients and Metal-Binding Proteins in Arabidopsis halleri
Source: PubMed Central journal article supplement (PMC3443489; doi:10.1007/s11270-012-1292-4), 2012-08-23
Supplement: 11270_2012_1292_MOESM1_ESM.pdf [file 11270_2012_1292_MOESM1_ESM.pdf]

attachment to manuscript

[Click here to download attachment to manuscript: Supplementary data Fig ESM 1.pdf](#)

[Click here to view linked References](#)

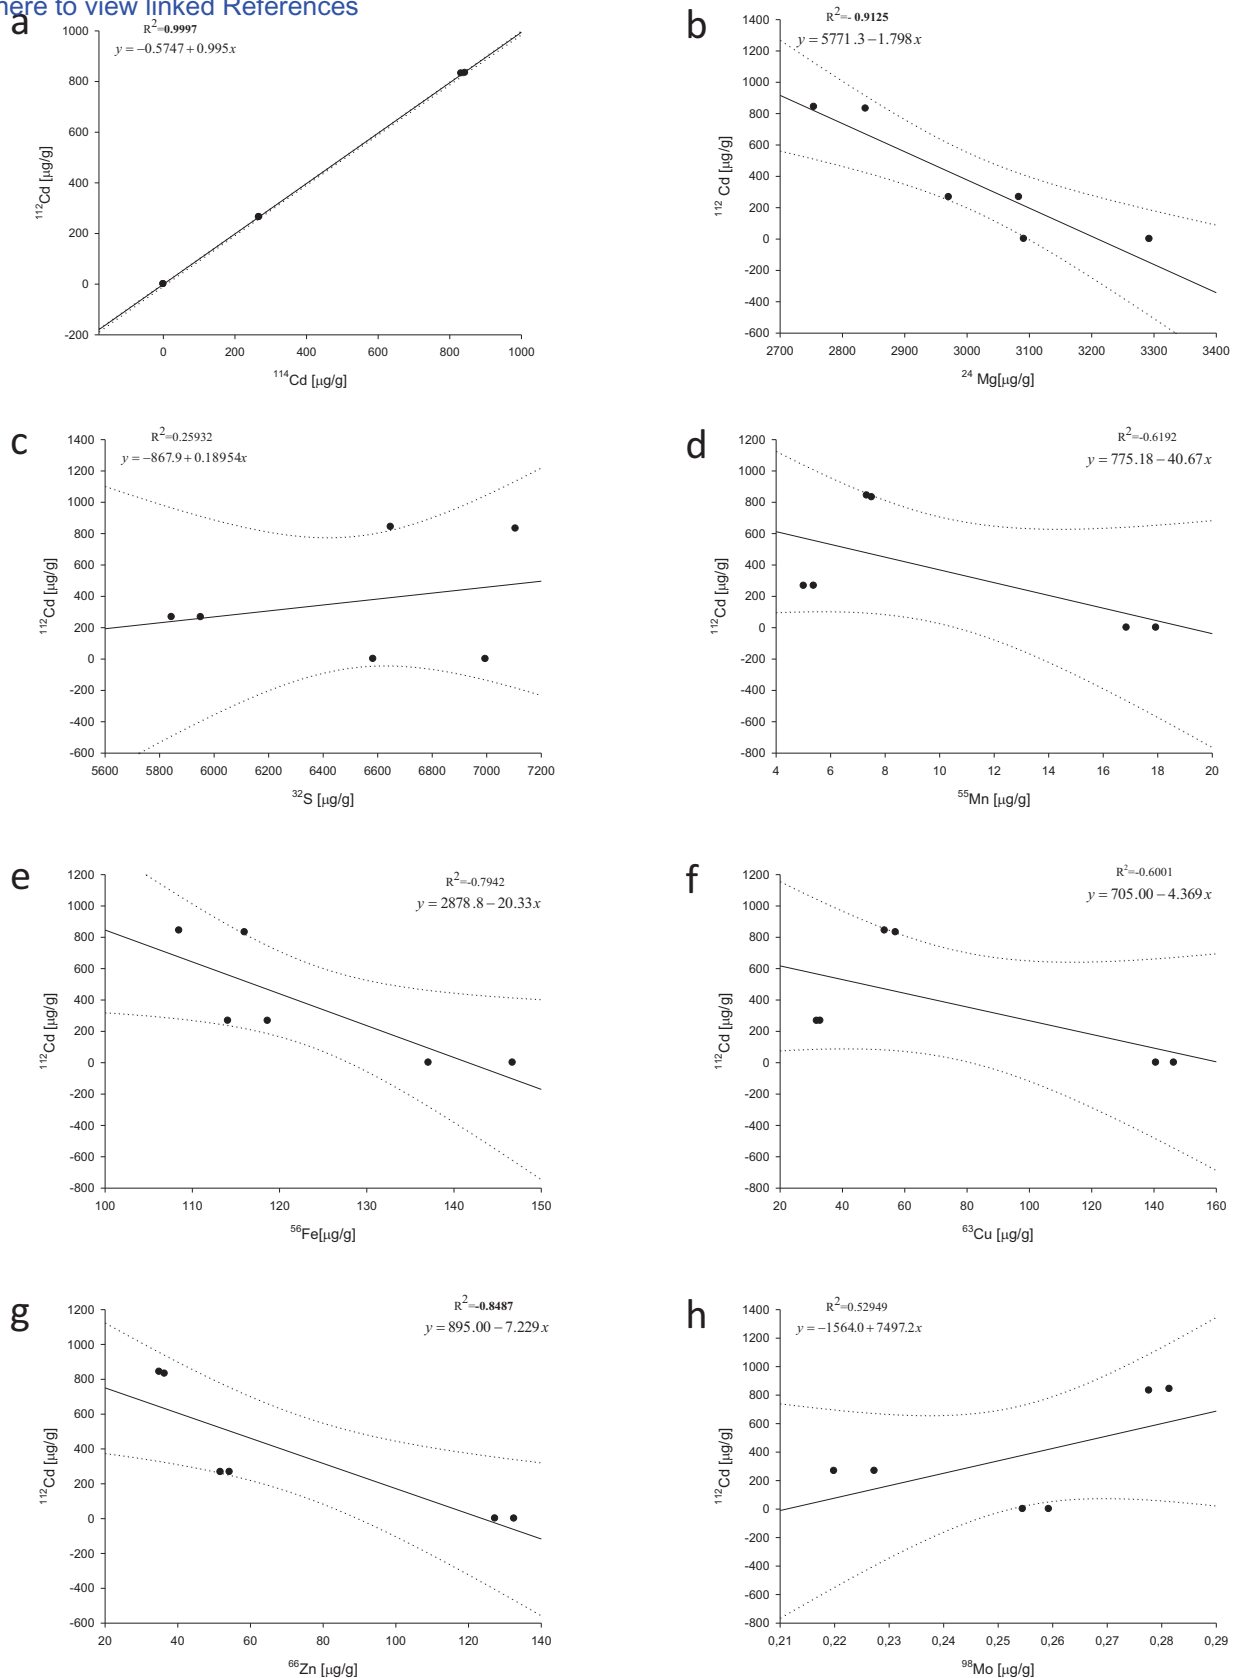

**Fig. ESM1 a-h** Scatter plots showing correlations between Cd and mineral nutrient content in *A. halleri* roots. Regression lines (solid line), 95 % confidence intervals (dotted lines), coefficient of determination ( $R^2$ ) and the equation of the regression line were given for each element. (a)  $^{114}\text{Cd}$  vs  $^{112}\text{Cd}$ , (b)  $^{24}\text{Mg}$  vs  $^{112}\text{Cd}$ , (c)  $^{32}\text{S}$  vs  $^{112}\text{Cd}$ , (d)  $^{55}\text{Mn}$  vs  $^{112}\text{Cd}$ , (e)  $^{58}\text{Fe}$  vs  $^{112}\text{Cd}$ , (f)  $^{63}\text{Cu}$  vs  $^{112}\text{Cd}$ , (g)  $^{66}\text{Zn}$  vs  $^{112}\text{Cd}$ , (h)  $^{98}\text{Mo}$  vs  $^{112}\text{Cd}$ . Element concentrations were quantified using ICP-MS
